# Supplementary material
Source: PubMed Central journal article supplement (PMC2681009)
Supplement: mmc1.pdf [file mmc1.pdf]

Supplemental Data

***DYNC2H1* Mutations Cause  
Asphyxiating Thoracic Dystrophy and  
Short Rib-Polydactyly Syndrome, Type III**

Nathalie Dagoneau, Marie Goulet, David Geneviève, Yves Sznajer, Jelena Martinovic, Sarah Smithson, Céline Huber, Geneviève Baujat, Elisabeth Flori, Laura Tecco, Anne-Lise Delezoide, Valérie Serre, Martine Le Merrer, Arnold Munnich, and Valérie Cormier-Daire

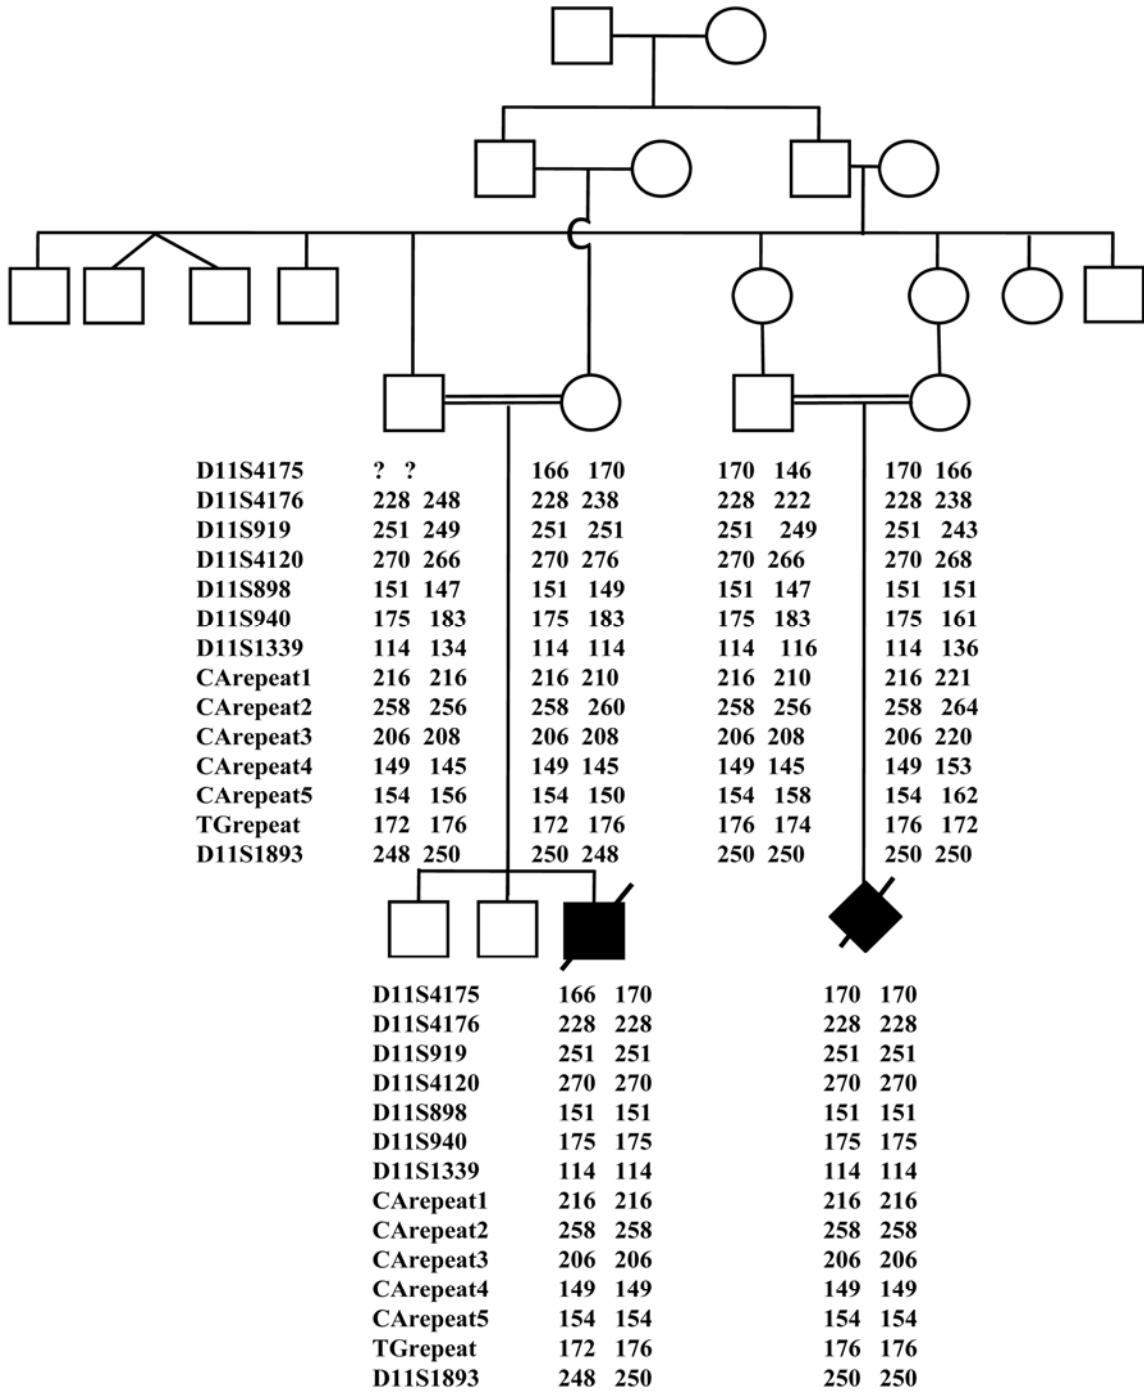

Figure S1. Haplotype of the Family 1 in the 11q14.3-11q23 Region

Note the common region of homozygosity in the two affected children.

Table S1. *DYNC2H1* Primer Sequences

|                  |                            |
|------------------|----------------------------|
| DYNC2H1ex1s      | ATAAACTTGTCCGAACCCCTTA     |
| DYDNC2H1ex1as    | TGGTAAAGCTAAAGAGTGTGACC    |
| DYNC2H1ex2s      | AGGAAAGAAGAGATAAAATTGGTTTT |
| DYNC2H1ex2as     | AATGTTGAGTTGATGTGGATTG     |
| DYNC2H1ex3s      | CAATCCACATCAACTCAACATT     |
| DYNC2H1ex3as     | ACCTATGCTCAGAGAAATTCCA     |
| DYNC2H1ex4s      | GTGGCACTAAGTAGACTTCAGGA    |
| DYNC2H1ex4as     | GCTGTAAAAATTGAATCCCAA      |
| DYNC2H1ex5s      | GGGGAAATTATAGGGTATTTGC     |
| DYNC2H1ex5as     | TGCTACATGATTTGCTTTAAGAGT   |
| DYNC2H1ex6s      | GCATGTGGTATTTCATAGATCCT    |
| DYNC2H1ex6as     | AGTTGACCAGTCTCACACAAAA     |
| DYNC2H1ex7s      | AGCATCACTTTGTTGTTGTCAC     |
| DYNC2H1ex7as     | TAAGTACATGTTTCATCCCAACG    |
| DYNC2H1ex8s      | TCTCTATTTTCTACCTGCCAGT     |
| DYNC2H1ex8as     | TTATAGTTGGACGCTTTACCA      |
| DYNC2H1ex9s      | ACAGTTTCCTGTTTATGTTGTTCTT  |
| DYNC2H1ex9as     | TAATCTTCAGCATGAAAATGTCAG   |
| DYNC2H1ex10s     | TGATACATGGTACAGTCCTTGG     |
| DYNC2H1ex10as    | CGACTCCTCTGCATACTTTTTTC    |
| DYNC2H1ex11s     | AAGGGGACTCCTTACTTTATGC     |
| DYNC2H1ex11as    | GGGAACAGACAAGAGAAACAAG     |
| DYNC2H1ex12s     | TCAAACAGTGAGAACATGAAACT    |
| DYNC2H1ex12as    | ACAGCTGGCAGTGCTATTCTAT     |
| DYNC2H1ex13s     | ACTTGGCAAATTGTAGGAACTC     |
| DYNC2H1ex13as    | CCTGGAAGCAAAACAAAATCTA     |
| DYNC2H1ex14s     | GAAATGGGCTACTCAATCTTTG     |
| DYNC2H1ex14as    | AATGGGAATTGTGATTTCTCTG     |
| DYNC2H1ex15s     | GTTTTGCCCTTCTCAGTACATT     |
| DYNC2H1ex15as    | CTTTTATGAACTTCTCGGCAAT     |
| DYNC2H1ex16s     | CGGAGAGTAACAAGGATGTACC     |
| DYNC2H1ex16as    | AATATTTAGCCCGGATTTCTTC     |
| DYNC2H1ex17s     | ATCAGTACCAGATGGGCTTAGA     |
| DYNC2H1ex17as    | TTTAATGTTATGCCACACAAGG     |
| DYNC2H1ex18s     | TCTTTAGGCTGTGCAGTAATGA     |
| DYNC2H1ex18as    | TGCCCTACCTAGATGATACTCAA    |
| DYNC2H1ex19s     | TCTAAATGTGCTTAAAGATCACCA   |
| DYNC2H1ex19as    | TGAATATGGACTTTTCCTGCTT     |
| DYNC2H1ex20s     | TCTTTGCTTATTCACATCTTG      |
| DYNC2H1ex20as    | AACCAGGTAAGCCAGACTATTG     |
| DYNC2H1ex21s     | TCTGCCAAATCAGAATATATAGGA   |
| DYNC2H1ex21as    | GTAGTCAGGGAGGTCAATTTCA     |
| DYNC2H1ex22s     | CCATCCTTTGAAAAGTTGACAT     |
| DYNC2H1ex22as    | AAAAGTGATGAAGTTTATGAGGAAA  |
| DYNC2H1ex23-24s  | CACACATACAAGGATTGCAGTT     |
| DYNC2H1ex23-24as | TTTCTATTTTCTTCATCAAACG     |
| DYNC2H1ex25s     | AAAGGGTAATTGTGTGTGTCC      |

|               |                             |
|---------------|-----------------------------|
| DYNC2H1ex25as | AGCAAACCTGATTCTTGGCTTAG     |
| DYNC2H1ex26s  | CCTTATGGTGAAAAGCCAGATA      |
| DYNC2H1ex26as | TCTCAAAGGATCCACTAGGAA       |
| DYNC2H1ex27s  | CCTTTAGTTCATTTTAAGCAGGTAA   |
| DYNC2H1ex27as | GTAGACTGGCCCAATATTTCTA      |
| DYNC2H1ex28s  | GTCACAACATTAACTACTCATGCT    |
| DYNC2H1ex28as | CACCAGAATTGTCACACTGTAT      |
| DYNC2H1ex29s  | TCCCTCAATAGGACATTTAAACA     |
| DYNC2H1ex29as | AATACTCCGAACTAACAAAACAAA    |
| DYNC2H1ex30s  | ACCCCGTCTTGAAATAACAGTA      |
| DYNC2H1ex30as | ATCCTACTCACCCTGGCCTA        |
| DYNC2H1ex31s  | GGTTCAGTATGACATTAAGATGG     |
| DYNC2H1ex31as | TTCCTCGAGTAATCACCAACAC      |
| DYNC2H1ex32s  | AATTCATGGAGAAATCACCTGT      |
| DYNC2H1ex32as | TGTGACACCTTTCTAATTCTGATT    |
| DYNC2H1ex33s  | TTTAACCTGTTTGTTCATTTTT      |
| DYNC2H1ex33as | ACGTACAACCTCTGTCCATTTTT     |
| DYNC2H1ex34s  | TGTTTATCCCTTGAAATCAACC      |
| DYNC2H1ex34as | CAGATTAGAAACACGGATGTCA      |
| DYNC2H1ex35s  | AATTCTGTTGGCAGCATATTTTA     |
| DYNC2H1ex35as | GAAAAGCAAGTAGTTTTGAACCA     |
| DYNC2H1ex36s  | ACCGTCCATCTTTAACAGCTTA      |
| DYNC2H1ex36as | TGGGGCAGGGTATACAGTAAT       |
| DYNC2H1ex37s  | TGATTAATAATGCATATCAAGGCTA   |
| DYNC2H1ex37as | TTTGATAAGAGCACACAGCAAG      |
| DYNC2H1ex38s  | TATTACATTTTAGGCAATACCTTCC   |
| DYNC2H1ex38as | CATGTAGAAGTCTTGACAAAGACAG   |
| DYNC2H1ex39s  | CTGAAGAATATCTTGTGGGAAT      |
| DYNC2H1ex39as | GACCAAATTTTCTTGCTGTTTC      |
| DYNC2H1ex40s  | GCAGACAAAATATGTGCGTAGA      |
| DYNC2H1ex40as | CAGCAAGATGGTTTTTGTAGT       |
| DYNC2H1ex41s  | TGAACATGTATTCTTTTTGGAA      |
| DYNC2H1ex41as | CATCATAAAATAACTCAAAGGAGA    |
| DYNC2H1ex42s  | TGGAAC TAAGATGATTTACTTTTTGG |
| DYNC2H1ex42as | CCAGTAGAAATCACACAACCTG      |
| DYNC2H1ex43s  | AGAAAGTTGCTTTGATAGTTATGGA   |
| DYNC2H1ex43as | CTAGATAAAACTGGCCCCAAT       |
| DYNC2H1ex44s  | TTCATAGAACACAGAGATTTGAACA   |
| DYNC2H1ex44as | GCCTATATTTTGAGAAGGGTAGG     |
| DYNC2H1ex45s  | AATTTGGTTGAAATGAGAATGG      |
| DYNC2H1ex45as | ACAACAGTGAATAAGGCACACA      |
| DYNC2H1ex46s  | GAAATCCAGTTCATCTACAGG       |
| DYNC2H1ex46as | TGACAATCATACACAGTTTGGAA     |
| DYNC2H1ex47s  | TCCATTTATCTGATGCCAAAAT      |
| DYNC2H1ex47as | ACTGAGCTGTACCTTACGGAAA      |
| DYNC2H1ex48s  | TTCTGGAGATGATCTTATTTGGA     |
| DYNC2H1ex48as | AACCAGCTTTGCCTATTCTACA      |
| DYNC2H1ex49s  | AAAATATTGAGTGTGAGATGATATG   |
| DYNC2H1ex49as | TAATAACCAATGTAATTTAAAACCA   |
| DYNC2H1ex50s  | TTAGGGGTTGGATTTACTTTCC      |

|               |                           |
|---------------|---------------------------|
| DYNC2H1ex50as | ACTATGCCAAAAGTTCTCCAAA    |
| DYNC2H1ex51s  | TTTGAGTGGTTTGCTTAGGTGT    |
| DYNC2H1ex51as | CCTTTGCAATCTAATGACAAAAT   |
| DYNC2H1ex52s  | AACCCAGACCACGTATAGATTG    |
| DYNC2H1ex52as | TGATGCAAGAGTACGAAGAAAA    |
| DYNC2H1ex53s  | TCTGGAATGAATCCTAGAAGAAA   |
| DYNC2H1ex53as | AAAATTTTGTTCATCAGAAGA     |
| DYNC2H1ex54s  | TAGTTGTCTAGGAATGCCTGTG    |
| DYNC2H1ex54as | AGGAAAGTGAGACTGTTTTCCA    |
| DYNC2H1ex55s  | CCTCTGTGGGATCTTTAACTACA   |
| DYNC2H1ex55as | AGTCTGACTCAGTATGAATAAGCAA |
| DYNC2H1ex56s  | GCATTTTGAAACTCTTTGTCT     |
| DYNC2H1ex56as | AGGCTTTCCTTCTTGTCTCTT     |
| DYNC2H1ex57s  | CCTTGTATGATTGAAAGCATTTT   |
| DYNC2H1ex57as | ATTTCAAGCCAAAATGTACACC    |
| DYNC2H1ex58s  | TCTGTCTCAAATCAAACAAACAA   |
| DYNC2H1ex58as | ACCTGATTCTGATGGTTAATGC    |
| DYNC2H1ex59s  | TGCCCAAATAAAGTGTGTTAGA    |
| DYNC2H1ex59as | TGAGTTGGTTCTTCTCTCTCCT    |
| DYNC2H1ex60s  | gggtcagaggaaacacttct      |
| DYNC2H1ex60as | ccacagcatcatctgacata      |
| DYNC2H1ex61s  | GTGTGTGGGTTTGTCTTTCTA     |
| DYNC2H1ex61as | AACATACGGAAGTAAAGGAAA     |
| DYNC2H1ex62s  | CCCTCACAGTCAAACCATAAA     |
| DYNC2H1ex62as | TGTGGAATTCAGCAAATCTAAA    |
| DYNC2H1ex63s  | TAAATGTGGAAGAATGGGTTTC    |
| DYNC2H1ex63as | GAATCATTGATGGGTTTTTCATT   |
| DYNC2H1ex64s  | TGGAGACGTAAAATAAGATGACAA  |
| DYNC2H1ex64as | GAAGCACAATGATGTGGTTAGT    |
| DYNC2H1ex65s  | CTCCAAAGCTTGAGAGAAAAGA    |
| DYNC2H1ex65as | AGGACCCAGTGTGAAATCTATG    |
| DYNC2H1ex66s  | GGGTTCTTATTAATACTTGGGTGA  |
| DYNC2H1ex66as | GGTCTCTACTGAGCTTTCCTGA    |
| DYNC2H1ex67s  | CTTTTGCCGTCTTAGACTCTGT    |
| DYNC2H1ex67as | GAATGCTTCACTCCAACATACA    |
| DYNC2H1ex68s  | tgtaatagtctgtcaaacacaagg  |
| DYNC2H1ex68as | aaacatagctccccttcttg      |
| DYNC2H1ex69s  | tgacagttaatatgggtttgc     |
| DYNC2H1ex69as | cccaatgttctgatgttttt      |
| DYNC2H1ex70s  | AAACCATGATTCATCATCTTCA    |
| DYNC2H1ex70as | TTACATGTGGTCTTTTGGAACA    |
| DYNC2H1ex71s  | ctttgaatctggaggaacaa      |
| DYNC2H1ex71as | tgctataaggcattccagtt      |
| DYNC2H1ex72s  | CCCCTGACTTGAAGTGTCTCTA    |
| DYNC2H1ex72as | TCATCCACAGGGAAGTAGAACT    |
| DYNC2H1ex73s  | TGTTGTCACATTAATTCATTCTTGA |
| DYNC2H1ex73as | GGAAATACTTAAGAGCCAGAA     |
| DYNC2H1ex74s  | GAATTTTACCATGGTGACTTGTA   |
| DYNC2H1ex74as | GGTAACTTTTTACTGGGGGAAC    |
| DYNC2H1ex75s  | CAAGGCAACACAAAGTAGAAGA    |

|                     |                           |
|---------------------|---------------------------|
| DYNC2H1ex75as       | CCAAATACGCCATTAAAGGTAA    |
| DYNC2H1ex76s        | AACAATGATAAGTGTTCCCATATTT |
| DYNC2H1ex76as       | CAGTTACAGAATGAGCCACCAT    |
| DYNC2H1ex77s        | GGCACCTTAAGCATAAAACAGA    |
| DYNC2H1ex77as       | CCACAGTTC TGAGGATTAGGAC   |
| DYNC2H1ex78s        | AAGCCAGTTAGGAAGGTTTAGG    |
| DYNC2H1ex78as       | TTGGCTTCTCTTATATGCCTTT    |
| DYNC2H1ex79s        | ATTTCAACCCAGTCAACATGA     |
| DYNC2H1ex79as       | TGTAAAAAGAAGTTGTGTGTTCTG  |
| DYNC2H1ex80s        | ATTTAACTCAAACCCGGTAAGC    |
| DYNC2H1ex80as       | CTCCCACAGTACTGGGATTACA    |
| DYNC2H1ex81s        | CTTTTCATGCTATGGCCAGTTA    |
| DYNC2H1ex81as       | GAATCCATGTAAAAACAGATCCA   |
| DYNC2H1ex82s        | AACTCAAGGCAGGAATTTAGTTA   |
| DYNC2H1ex82as       | TTATGATCAACCACCCAACTTT    |
| DYNC2H1ex83s        | AATGACAGAATACTTCCCACAGA   |
| DYNC2H1ex83as       | AAAAC TGGAATGTGTTGTGAAA   |
| DYNC2H1ex84s        | TTGACAACATTTTTGGTCTCTA    |
| DYNC2H1ex84as       | AGGGAAGAACTGAAATTATGTG    |
| DYNC2H1ex85s        | GAATCCCTTCTCTGTGATTTG     |
| DYNC2H1ex85as       | TGACTCGGGTCTTCTGCTATTA    |
| DYNC2H1ex86s        | CAGGAACTTGTA CTTTCTTCC    |
| DYNC2H1ex86as       | ACAAAAATAACAAATGGCAGAA    |
| DYNC2H1ex87s        | AAATTGCAATGCCAGACTTTAC    |
| DYNC2H1ex87as       | AGGGCAGTGTAA TAGGAAGTCA   |
| DYNC2H1ex88s        | GGAAC TTACAGCATCAAAGAGG   |
| DYNC2H1ex88as       | TTCATGCCAAATCTTATTTTGA    |
| DYNC2H1ex89s        | CACTAGTCCAGGCCTTACTGAC    |
| DYNC2H1ex89as       | TGTTCAAATGCAGGTGAGATTA    |
| DYNC2H1ex90fragt1s  | GGATGATAGGGGTT CATCATATT  |
| DYNC2H1ex90fragt1as | CACAGTGCTGCTTTTACACATT    |
| DYNC2H1ex90fragt2s  | CATCTTCACAAAAGGGAACATT    |
| DYNC2H1ex90fragt2as | CTCTATCCTGGGCAACAGAGT     |
